# Supplementary material for: Root-Secreted Coumarins and the Microbiota Interact to Improve Iron Nutrition in Arabidopsis
Source: PubMed Central journal article supplement — Cell Host Microbe. 2020 Dec 9;28(6):825–837.e6. doi: 10.1016/j.chom.2020.09.006 (PMC7738756; doi:10.1016/j.chom.2020.09.006), 2020-12-09
Supplement: mmc1.pdf [file mmc1.pdf]

Cell Host & Microbe, Volume 28

## Supplemental Information

### Root-Secreted Coumarins and the Microbiota

#### Interact to Improve Iron Nutrition in *Arabidopsis*

Christopher J. Harbort, Masayoshi Hashimoto, Haruhiko Inoue, Yulong Niu, Rui Guan, Adamo D. Rombolà, Stanislav Kopriva, Mathias J.E.E.E. Voges, Elizabeth S. Sattely, Ruben Garrido-Oter, and Paul Schulze-Lefert

# Figure S1

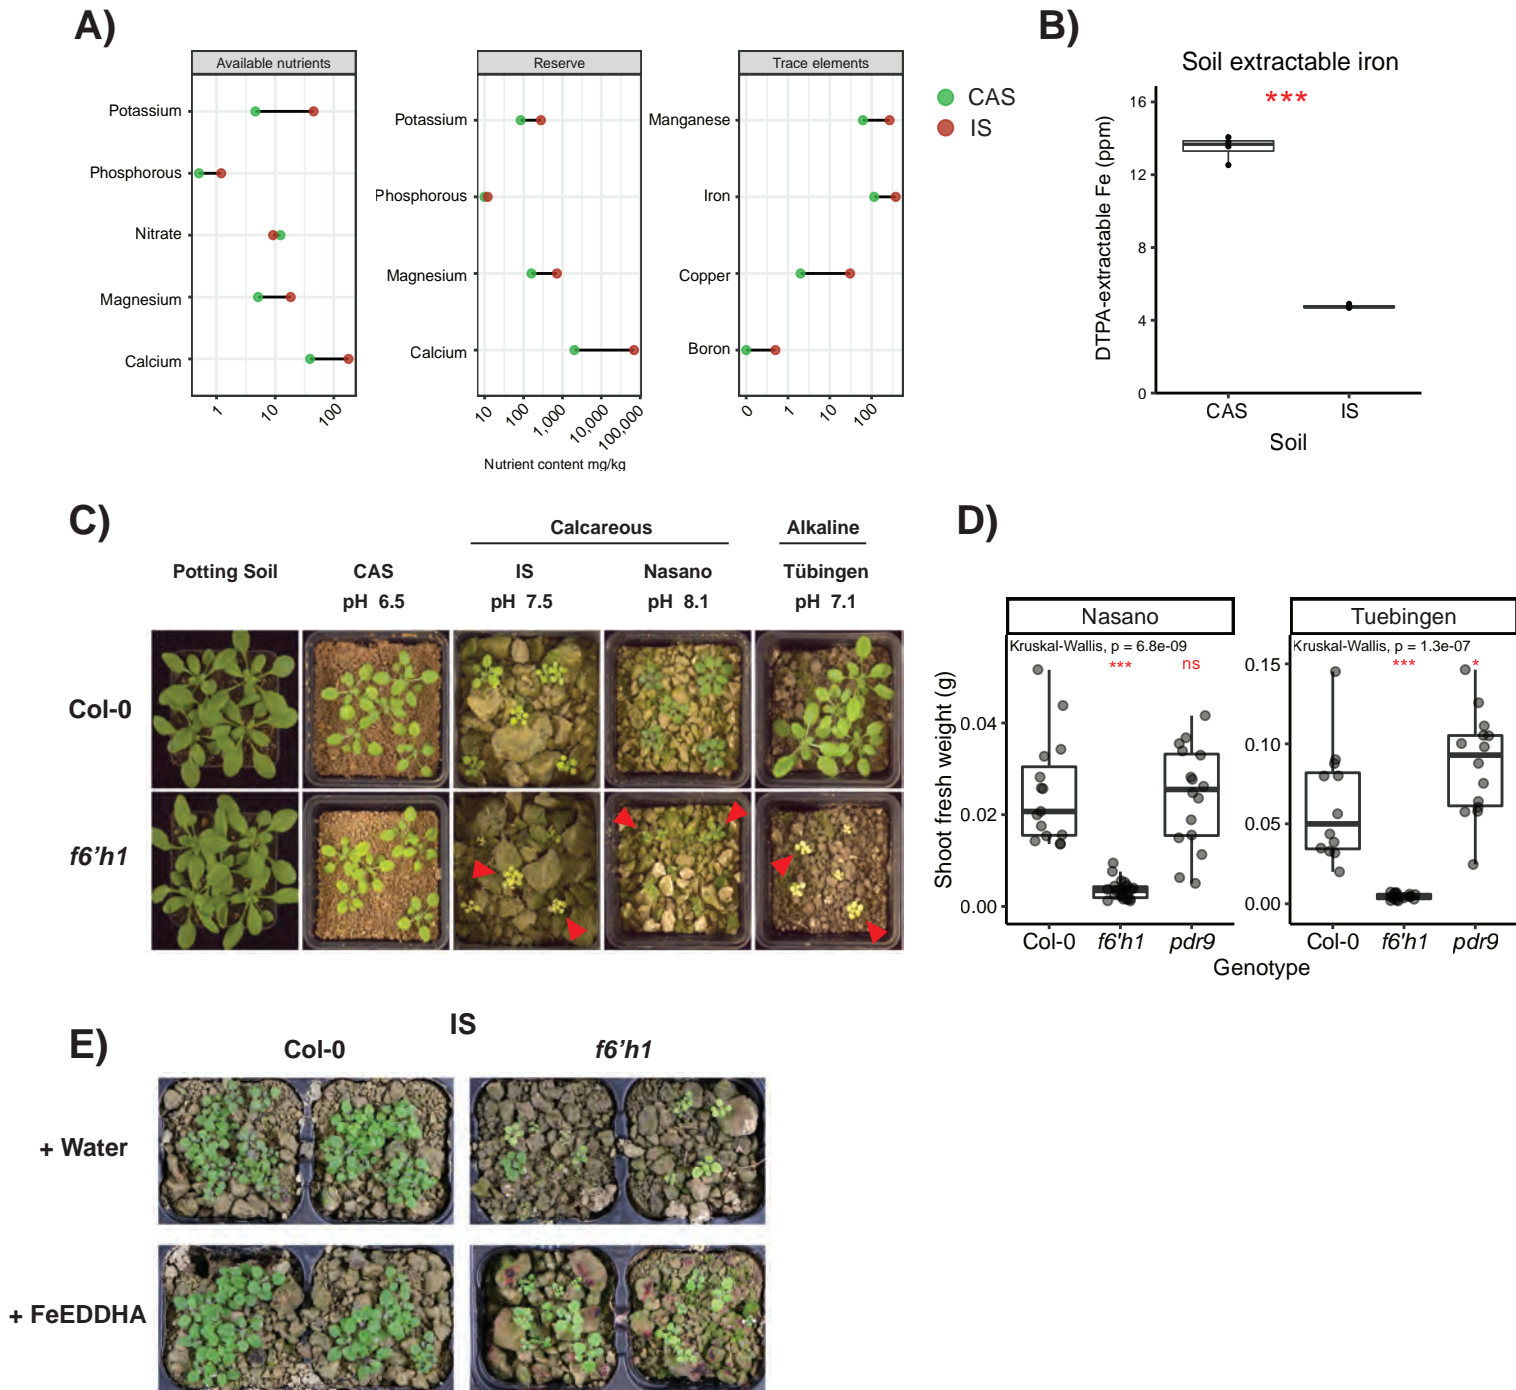

**Figure S1, related to Figure 1. *f6'h1* plants exhibit stunted growth on alkaline and calcareous soils due to iron limitation.**

**A)** Soil nutrient analysis of CAS and IS showing plant-available (water soluble) nutrients, reserve (ammonium nitrate EDTA extractable) nutrients, and trace elemental content. Soil analyses were performed by Labor für Boden- und Umweltanalytik, Switzerland. **B)** Plant-available iron content in CAS and IS. Available iron was measured as the amount of DTPA-extractable iron as in (Lindsay and Norvell, 1978). Data are from 4 extractions of a single batch of each soil. Significance was determined by Student's T-test. **C)** *f6'h1* plants grow poorly in multiple alkaline and calcareous soils. Red arrowheads highlight plants displaying stunting and chlorosis. **D)** Shoot fresh weight of Col-0, *f6'h1*, and *pdr9* plants grown on Nasano and Tübingen soils from C). Data are from a single soil batch and 12-24 plants per genotype. Statistical significance was determined by Kruskal-Wallis; each mutant was compared to Col-0 by Wilcoxon Ranked Sum post-hoc. **E)** Poor growth of *f6'h1* on calcareous IS soil is improved by watering with FeEDDHA solution, an iron complex with improved solubility and availability under alkaline conditions. Significance in **B)** and **D)** is indicated by red asterisks (\*, \*\*, \*\*\*, indicate  $p < 0.05$ ,  $0.01$ , and  $0.001$ , respectively).

# Figure S2

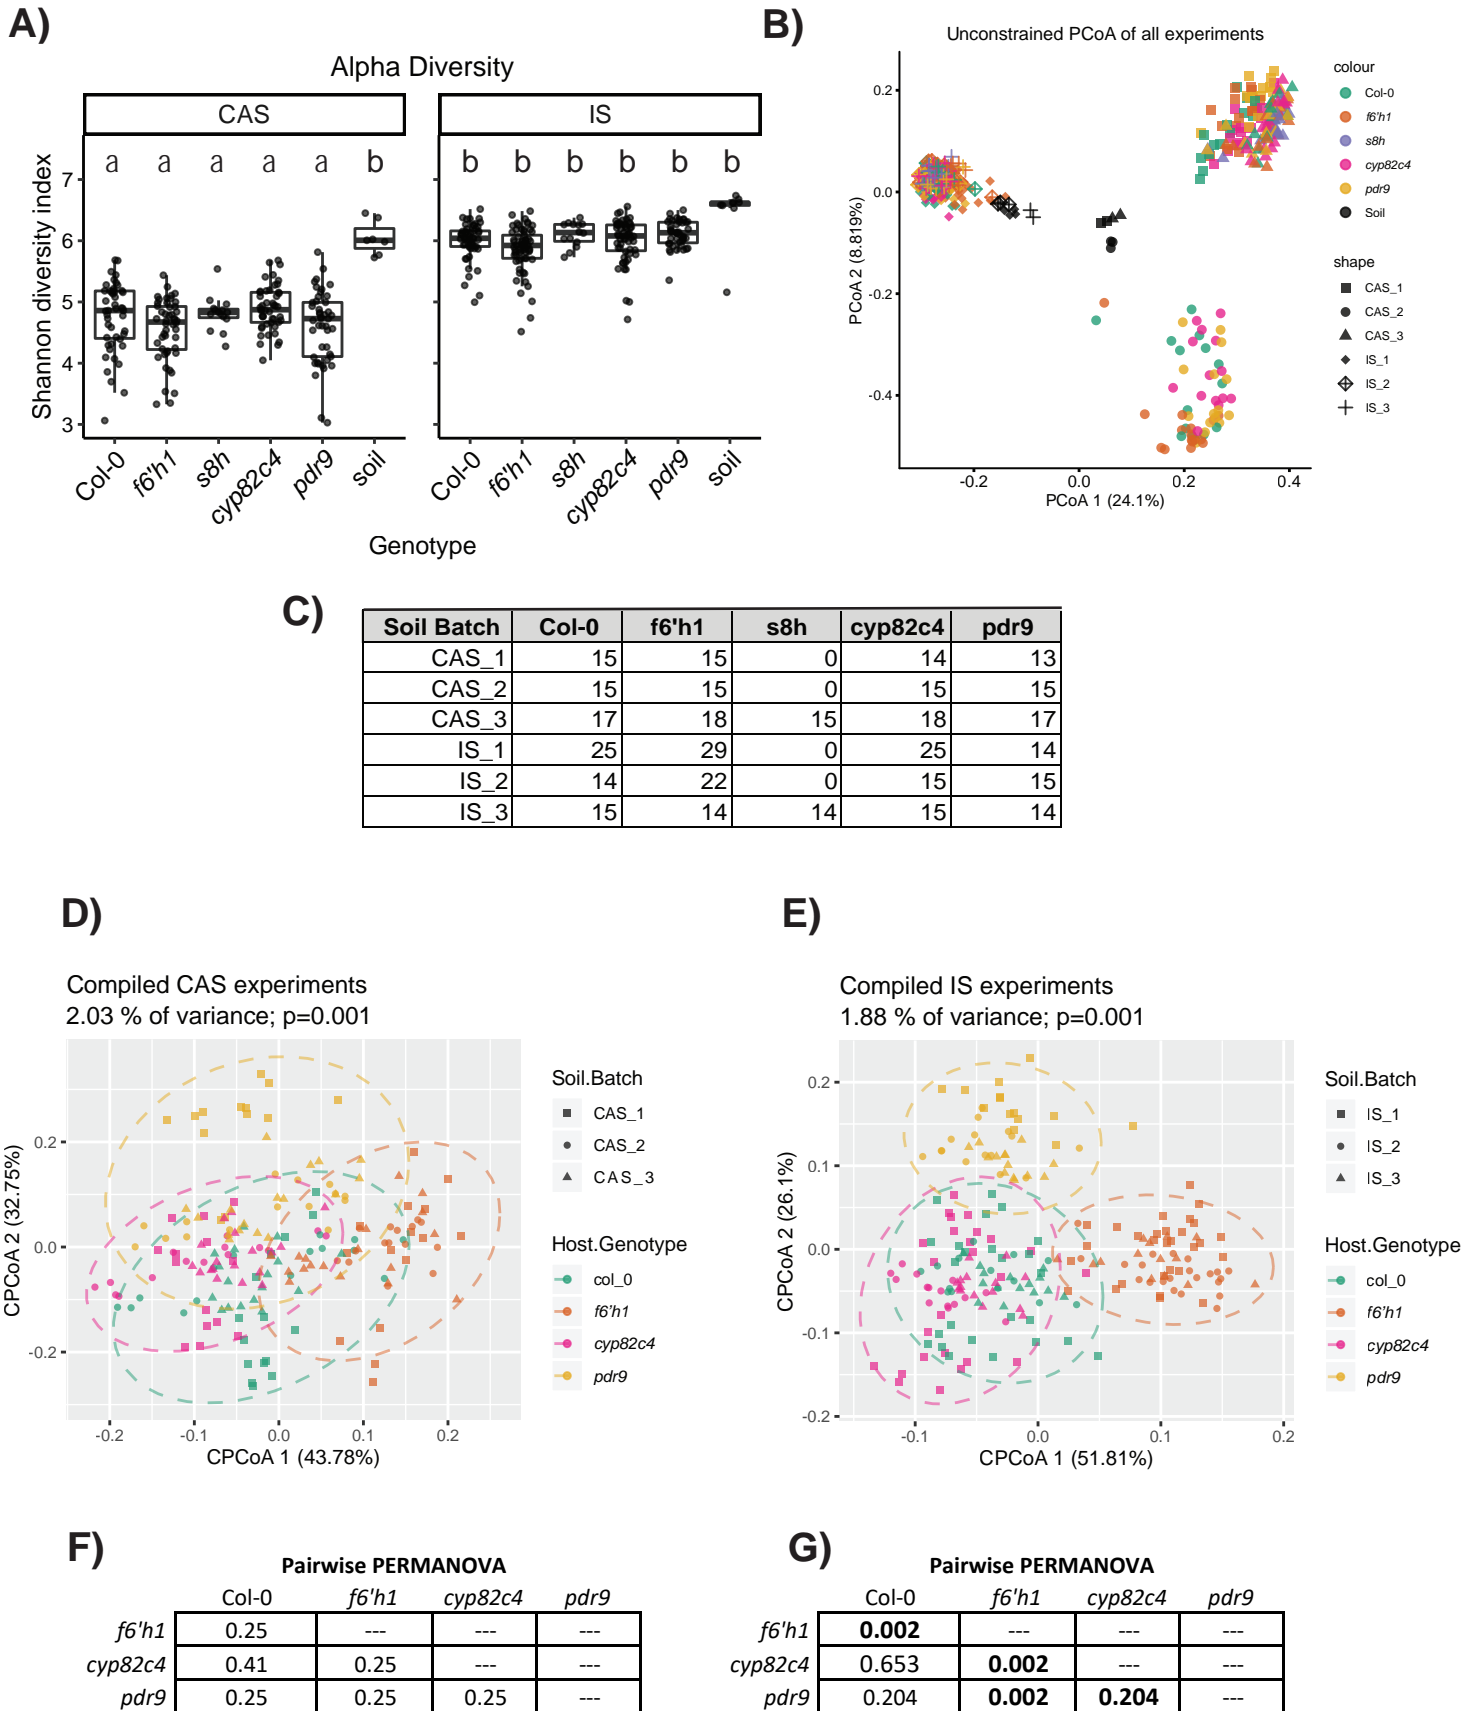

Permutations: 999

P value adjustment method: fdr

**Figure S2, related to Figures 1 and 2. *f6'h1* plants have an altered root bacterial community on IS.**

**A)** Shannon index (alpha diversity) of root samples from CAS and IS. Soil and root samples from IS have increased diversity compared to CAS samples, but did not vary by genotype. Letters indicate significant pairwise differences between groups ( $p \leq 0.05$  by Dunn's pairwise comparison with Bonferroni correction). **B)** Unconstrained principle coordinate analysis (PCoA) of community profiles from three experimental replicates in each soil. The largest driver of beta-diversity is soil type, with CAS and IS samples separating along PCoA1. **C)** Summary of sample and experimental replicates for root bacterial community profiling experiments. Numbers indicate pooled root samples. Constrained PCoA (constrained for Genotype and conditioned on soil batch) displaying root bacterial community beta diversity on three batches of CAS soil (**D**) and IS soil (**E**). Genotype *s8h* was removed from the analysis, as it was only included in one of three experiments (see **Figure 1**). The genotype effect on Bray-Curtis distances was calculated for compiled batches of CAS (**F**) and IS (**G**) samples by ADONIS test 999 permutations. Pairwise comparisons using PERMANOVA were performed on the distance matrix with 999 permutations. P values were adjusted for multiple comparisons with the FDR method. Significant separation of *f6'h1* samples from Col-0 was observed on IS, but no significant separation was observed on CAS.

# Figure S3

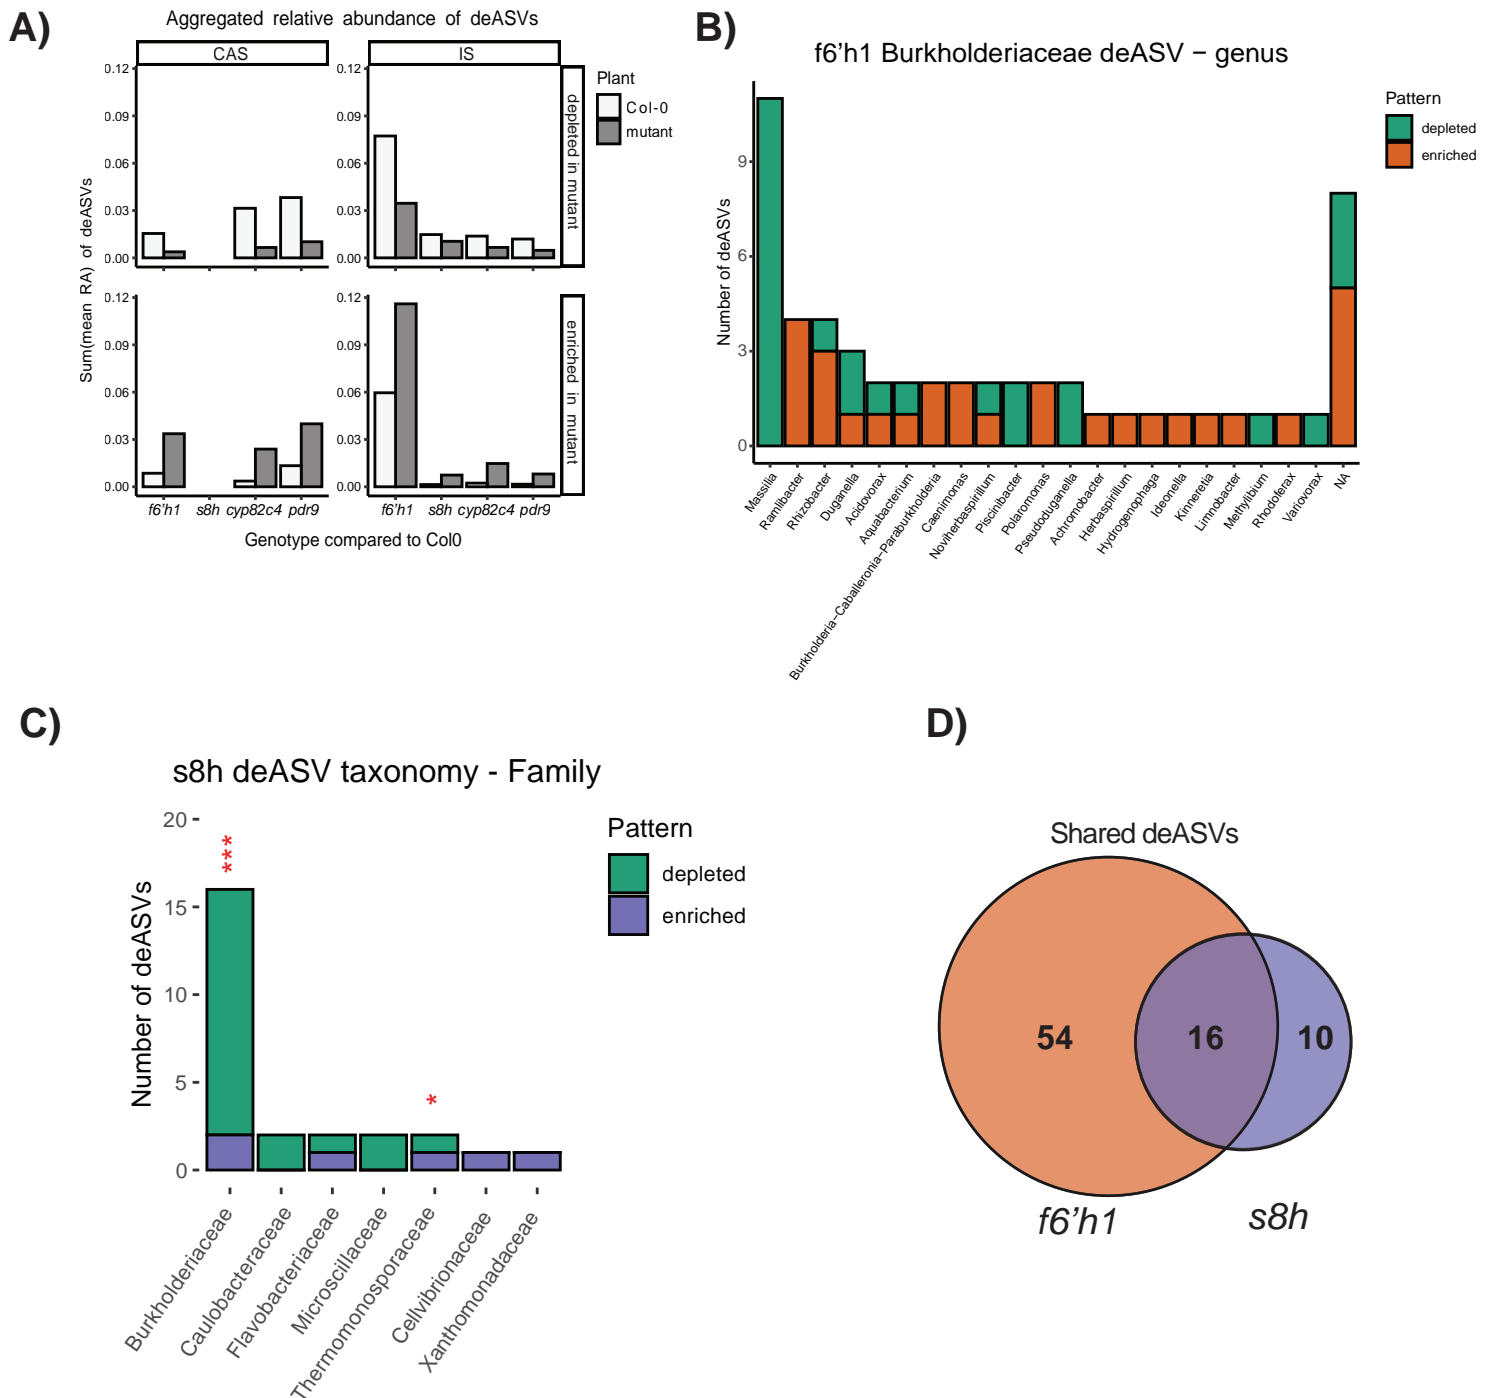

**Figure S3, related to Figure 2. Burkholderiaceae ASVs are significantly impacted by coumarin biosynthesis.**

**A)** For the deASVs identified in each indicated mutant-Col-0 comparison (**Figure 2A**), the mean RA was calculated in each genotype and soil type. To quantify the magnitude of change in community composition attributable to differential enrichment of deASVs, the aggregated RA was calculated as the sum of the mean RA of all deASVs. Each paired bar set displays the aggregated relative abundance in Col-0 (white) and the indicated mutant (grey) of deASVs identified from the indicated Col-0-mutant comparison. **B)** Taxonomy of Burkholderiaceae deASVs from **Figure 2B** at genus-level resolution. **C)** Taxonomy of deASVs detected on *s8h* in IS. The hypergeometric enrichment test was performed for deASVs identified in **Figure 2A**. All significant deASVs detected in *s8h* vs Col-0 growing in IS were compiled at the family level and were compared to all ASVs detected in these samples. Positive enrichment denotes families present in the deASV subset more frequently than expected if ASVs were selected at random; negative enrichment indicates underrepresentation in deASVs. Data are from a single experiment (see **Figure 1**). **D)** Venn diagram showing the overlap of deASVs detected on *f6'h1* and *s8h* in IS from a single experiment containing both genotypes.

# Figure S4

A)

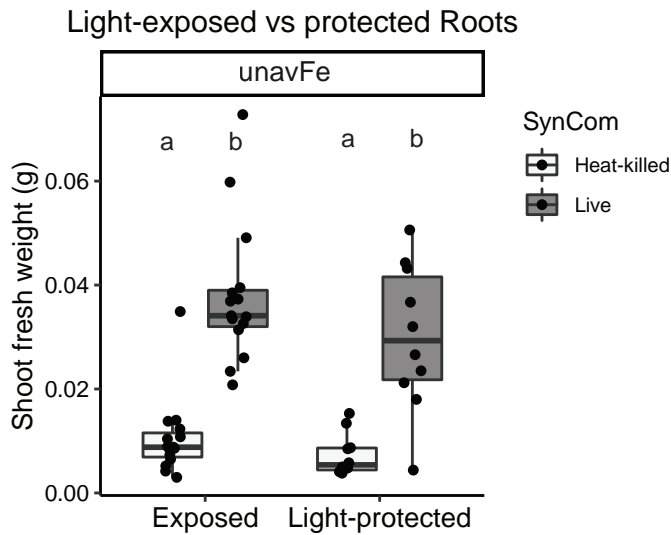

B)

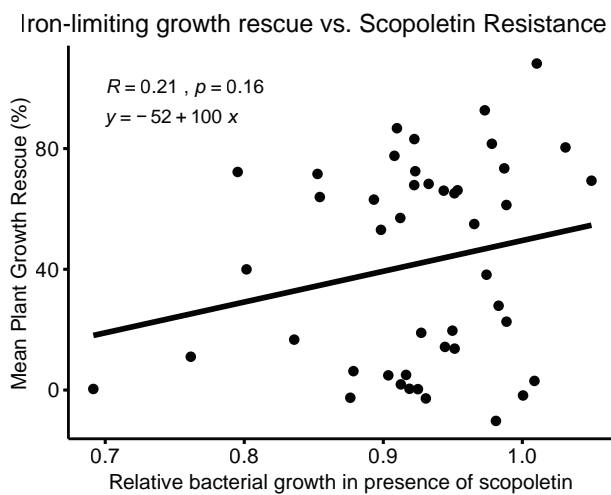

C)

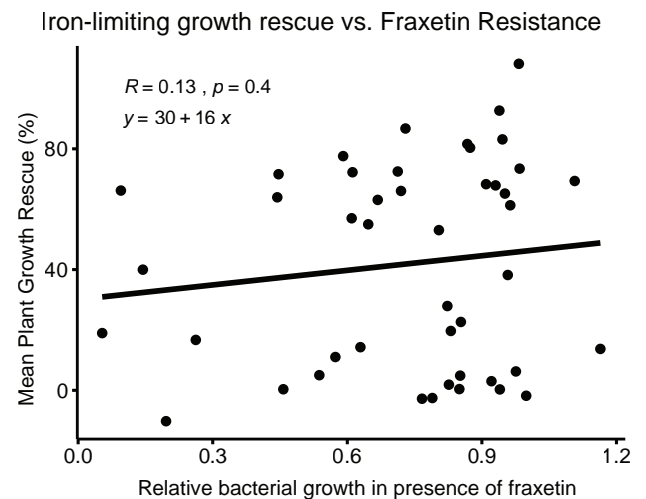

**Figure S4, related to Figure 3. Iron-limiting plant growth rescue by bacterial SynCom is not affected by root exposure to light, and is independent of susceptibility to coumarin antimicrobial activity.**

**A)** Shoot fresh weight of WT plants grown for two weeks on unavFe in vertical agar plates. Light-exposed roots were not shielded from light during growth; light-protected samples were grown in completely opaque black plastic boxes with only the shoots exposed to light as described in (Silva-Navas et al., 2015). Data are from a single experiment ( $n=15$  and  $10$  plants for light-exposed and light-protected groups, respectively). Letters indicate significant pairwise differences between groups ( $p\text{-adj} \leq 0.05$  by Dunn's pairwise comparison with Bonferroni correction). **B)** Plant growth rescue activity of strains tested in mono-association in **Figure 3D** correlated with their growth in the presence of  $50\mu\text{M}$  scopoletin, and **C)** fraxetin. Sensitivity to coumarins was assessed by overnight culture optical density as in **Figure 2D**.

# Figure S5

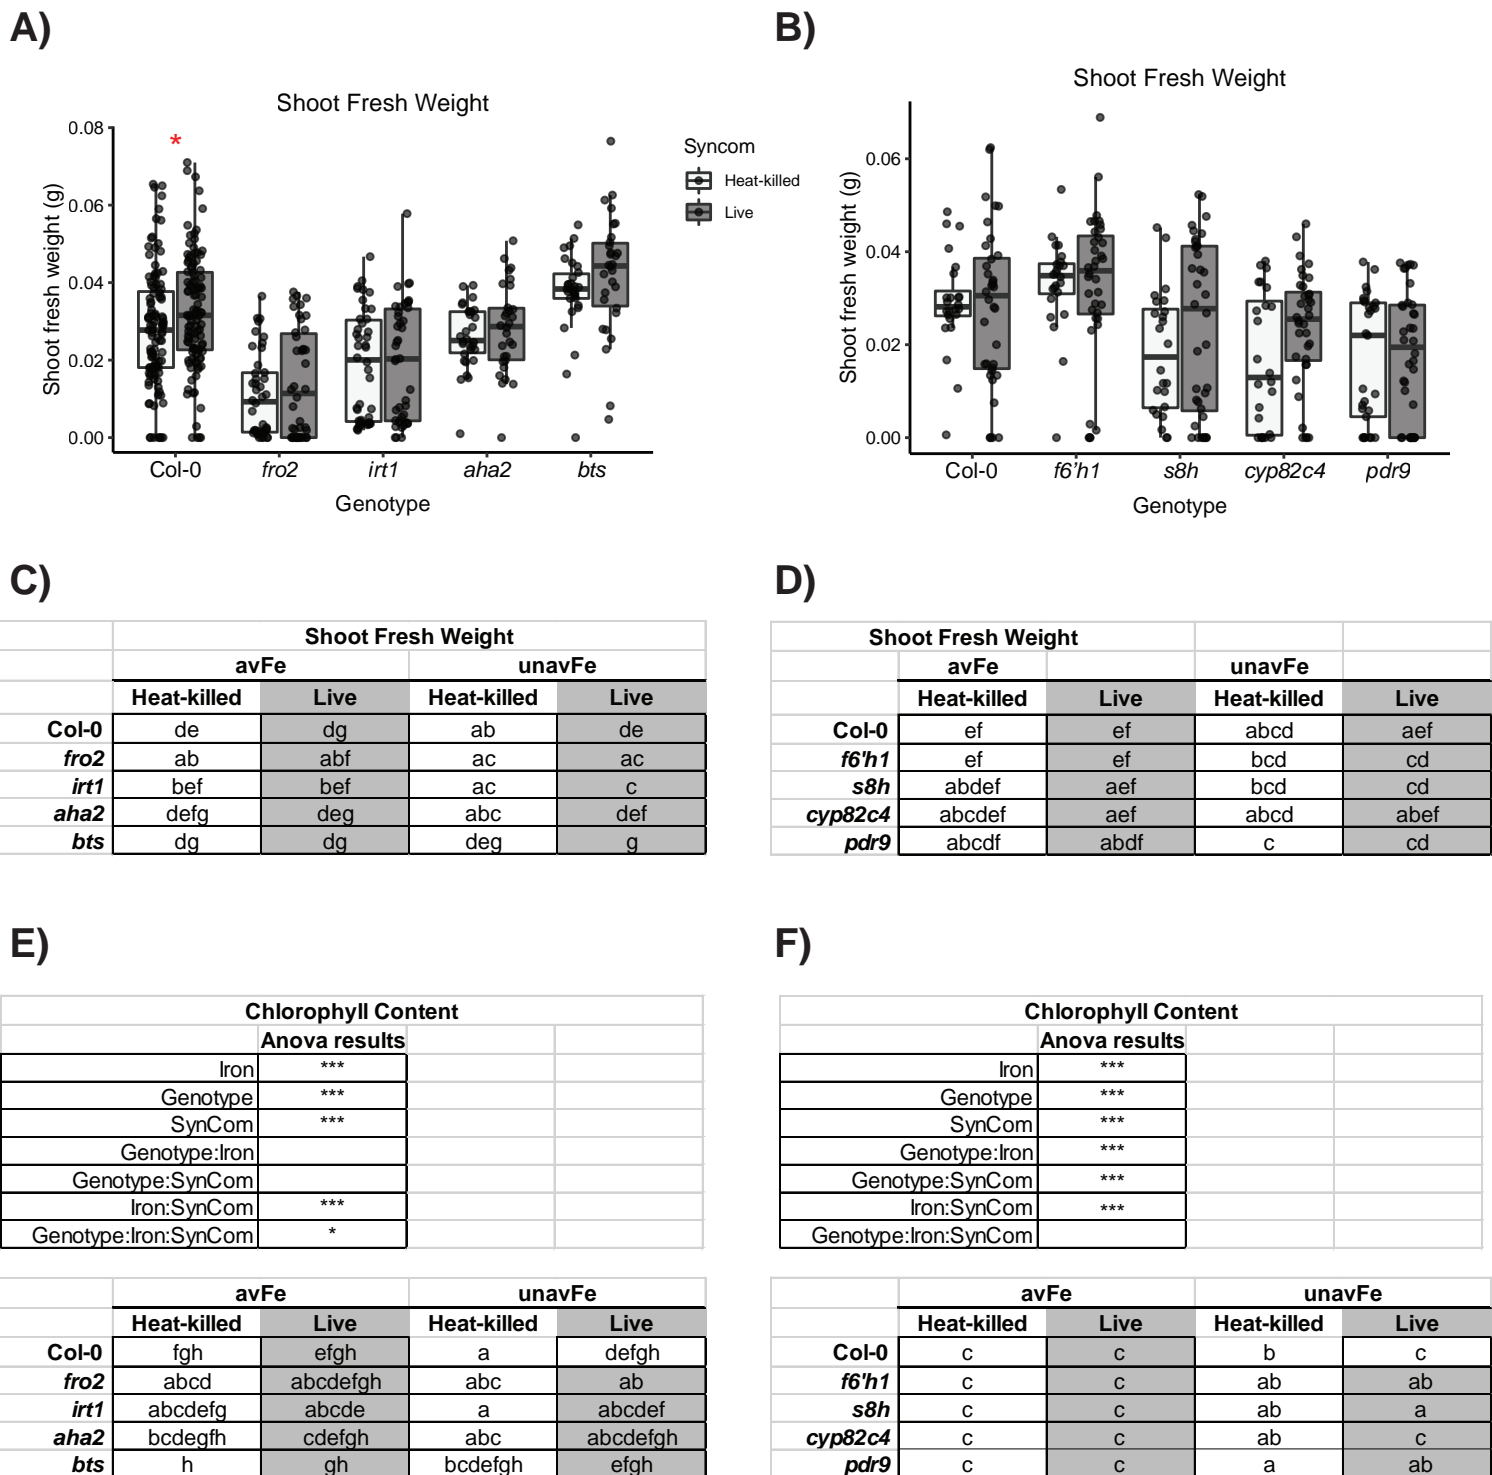

**Figure S5, related to Figures 4 and 5. Plant growth promotion by bacterial SynCom is not observed in iron homeostasis or coumarin pathway mutants on avFe.**

SFW of **A)** iron homeostasis pathway mutants, and **B)** coumarin biosynthesis and secretion mutants grown on avFe with and without live SynCom. Data in **A)** are from two independent experiments per genotype (See **Figure 4**,  $n = 36$  plants). Each experiment included Col-0 control ( $n = 90$  plants). Data in **B)** are from two experiments (See **Figure 5**,  $n = 36$  plants). Asterisks indicate significance between heat-killed- and live SynCom-inoculated groups by Wilcoxon Ranked Sum test (\*, \*\*, \*\*\*, indicate  $p < 0.05$ , 0.01, and 0.001, respectively). No significant differences were detected in **B)**. **C)** Results of Dunn's pairwise comparison with Bonferroni correction for SFW of all groups in **Figures 4**, and **D)** results for **Figure 5**. Letters indicate significance groups ( $p\text{-adj} \leq 0.05$ ). **E)** Results of three-factor ANOVA for effects of Genotype, Iron, and SynCom, and significance letters from Tukey's HSD *post-hoc* corrected for multiple comparisons for leaf chlorophyll content in **Figure 4**, and **F)** for **Figure 5** (\*, \*\*, \*\*\*, indicate  $p\text{-adj} < 0.05$ , 0.01, and 0.001, respectively; letters indicate significance groups at  $p\text{-adj} \leq 0.05$ ).

**Figure S6**

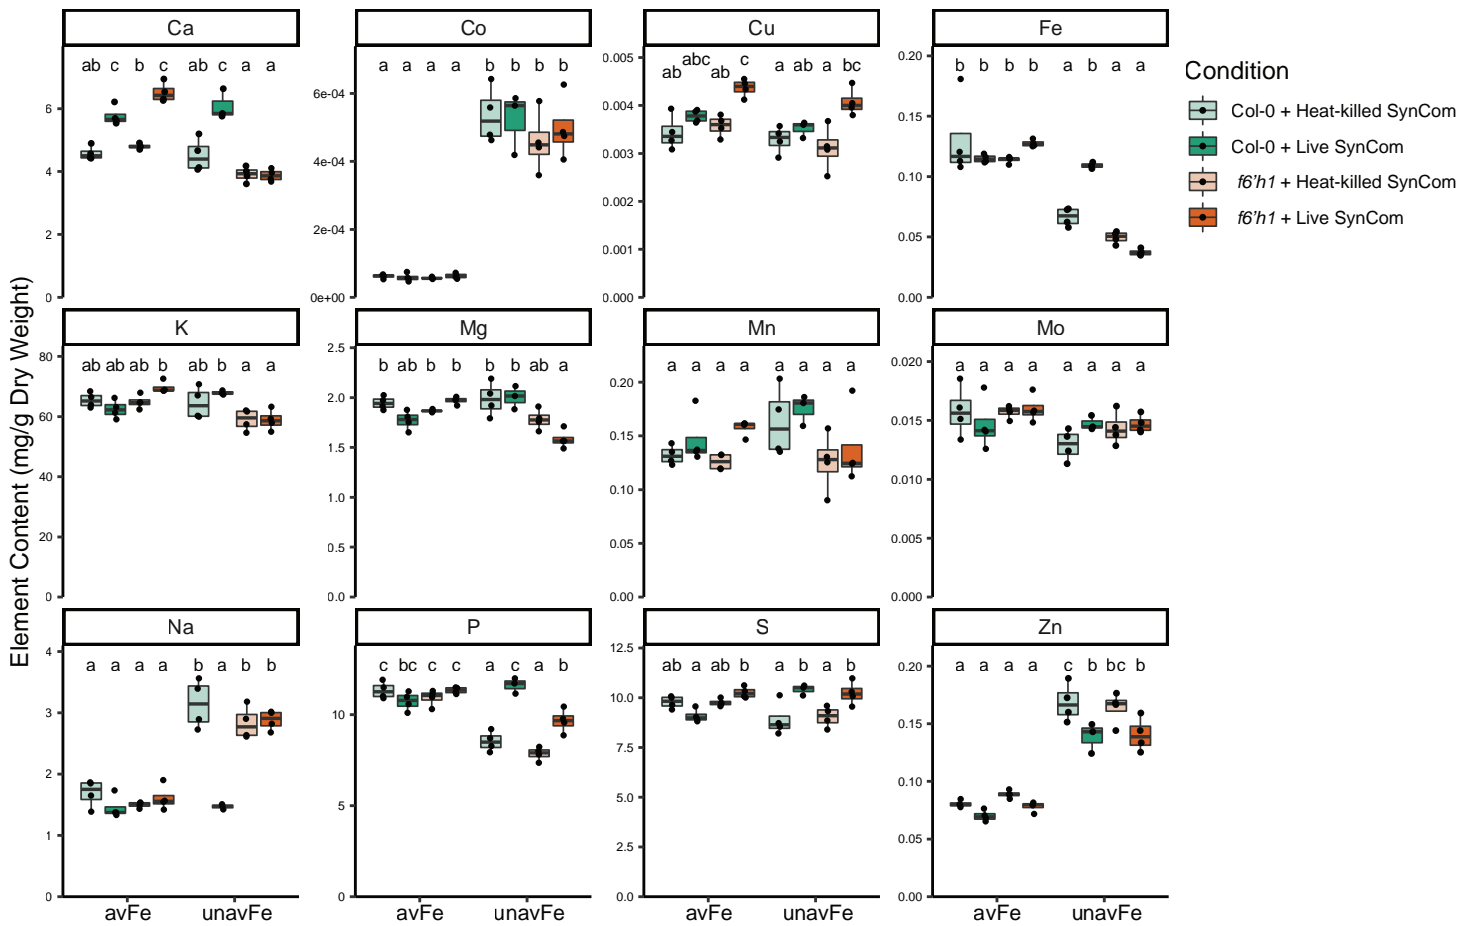

**Figure S6, related to Figure 7. Effects of iron availability, coumarin biosynthesis, and bacterial SynCom on plant elemental content.**

Leaf elemental content of Col-0 and *f6'h1* plants grown on avFe and unavFe, inoculated with a live bacterial SynCom or heat-killed control. Plants were grown for two weeks in indicated conditions before harvest, desiccation, and analysis by ICP-MS. Letters indicate significance groups ( $p\text{-adj} \leq 0.05$ ) by Tukey's HSD corrected for multiple comparisons ( $n = 3\text{-}4$  pooled plant samples per group).



# Figure S7

**A)**

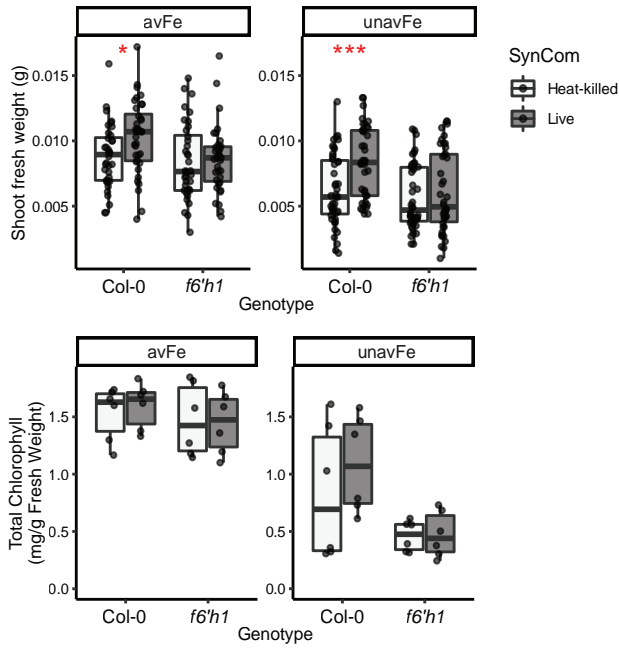

**B)**

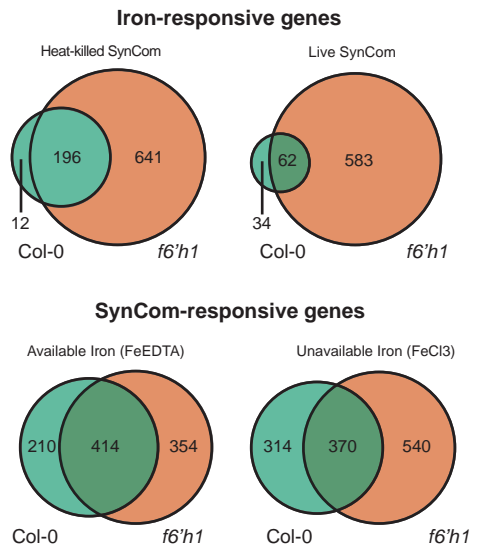

**C)**

| Genes upregulated by iron starvation | TAIR_ID   | Cluster |
|--------------------------------------|-----------|---------|
| Kelch repeat family protein          | AT3G07720 | 4       |
| MTPA2                                | AT3G58810 | 4       |
| IRT1                                 | AT4G19690 | 4       |
| 2OG                                  | AT3G12900 | 4       |
| unknown                              | AT3G61930 | 4       |
| GLP5                                 | AT1G09560 | 4       |
| Unknown                              | AT3G06890 | 4       |
| COPT2                                | AT3G46900 | 2       |
| UGT72E1                              | AT3G50740 | 4       |
| bHLH039                              | AT3G56980 | 4       |
| MYB72                                | AT1G56160 | 4       |
| Cation efflux family protein         | AT3G58060 | 4       |

  

| Genes downregulated by iron starvation | TAIR_ID   | Cluster |
|----------------------------------------|-----------|---------|
| FER1                                   | AT5G01600 | 8       |
| ATABC1                                 | AT4G04770 | 8       |
| unknown                                | AT2G36885 | n.s.    |
| PSAF                                   | AT1G31330 | 5       |
| uncharacterized protein (UPF0016)      | AT1G68650 | 8       |
| PER21                                  | AT2G37130 | 5       |
| FER4                                   | AT2G40300 | 8       |
| LAC7                                   | AT3G09220 | n.s.    |
| SAPX                                   | AT4G08390 | 5       |
| unknown                                | AT5G59400 | 8       |
| HEMA1                                  | AT1G58290 | 8       |
| FSD1                                   | AT4G25100 | 8       |
| peroxidase, putative                   | AT5G64100 | 10      |

**D)**

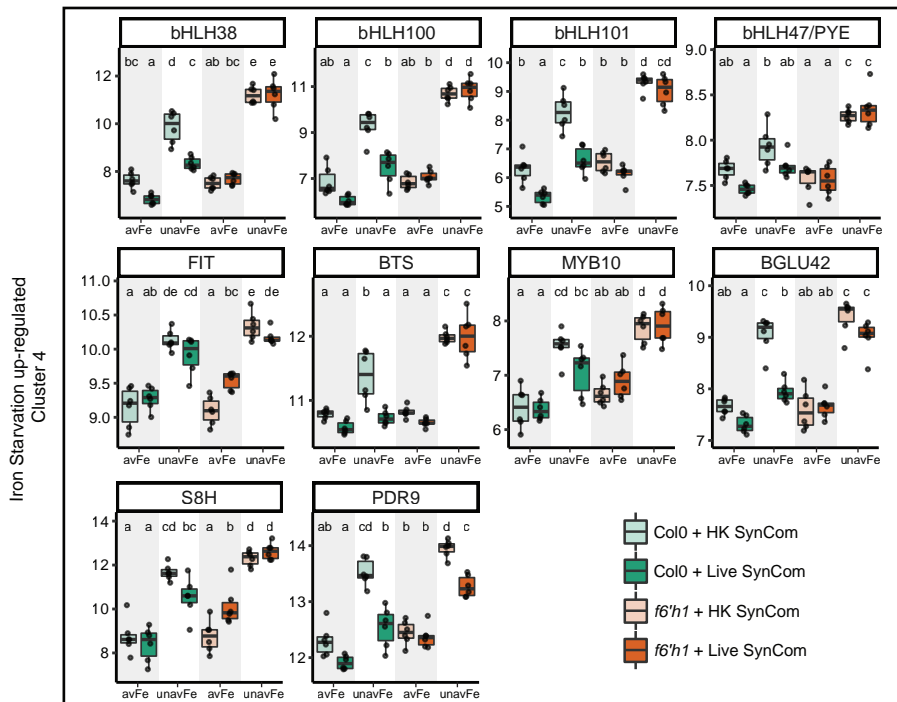

**E)**

| Cluster | DEG transcripts |
|---------|-----------------|
| 1       | 28              |
| 2       | 306             |
| 3       | 263             |
| 4       | 366             |
| 5       | 314             |
| 6       | 90              |
| 7       | 175             |
| 8       | 306             |
| 9       | 55              |
| 10      | 687             |

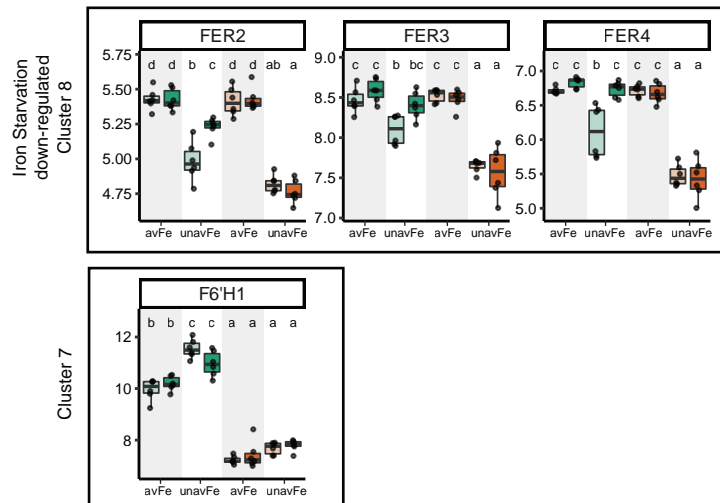

**Figure S7, related to Figure 7. Bacterial SynCom alleviates iron starvation-associated transcriptional signature in a coumarin-dependent manner.**

**A)** SFW and chlorophyll content in plants used for RNASeq experiment after eight days of growth in experimental conditions. (n = 36 plants for SFW, and 6 pooled-plant samples for chlorophyll content). Asterisks indicate significance between heat-killed- and live SynCom-inoculated groups by Wilcoxon Ranked Sum test for SFW and Student's T-test for chlorophyll content (\*, \*\*, \*\*\*, indicate  $p \leq 0.05$ , 0.01, and 0.001, respectively).

**B)** Venn diagrams showing the overlap of identified iron-responsive genes between Col-0 and *fb'h1* plants inoculated with heat-killed or live SynCom. Iron-responsive DEGs were defined as having  $\geq 2$ -fold change in expression in unavFe vs avFe samples with fdr-adjusted p-value  $\leq 0.05$ . SynCom-responsive DEGs were defined as having  $\geq 2$ -fold change in expression in live vs heat-killed SynCom samples with FDR-adjusted p-value  $\leq 0.05$ . **C)** Cluster assignment of iron starvation response marker genes. Iron starvation-responsive genes (Mai et al., 2016) and their indicated clusters in DEG heat map in **Figure 5**. **D)** Expression patterns of selected iron homeostasis-related genes from RNA-Seq experiment. Data are log<sub>2</sub>-transformed counts after regularized logarithm normalization (rld normalization in *DESeq2*). Expression pattern is consistent with iron starvation being induced on unavFe in both genotypes and alleviated by addition of SynCom in Col-0, but not *fb'h1* plants. Letters indicate significant pairwise differences between groups ( $p\text{-adj} \leq 0.05$  by Tukey's HSD corrected for multiple comparisons). **E)** Number of DEGs sorted into each cluster.

**Table S1**

| Name  | Primer Sequence                                                               | Size |
|-------|-------------------------------------------------------------------------------|------|
| 799F  | AACMGATTAGATACCKG                                                             | 20   |
| 1192R | ACGTCATCCCCACCTTC                                                             | 18   |
| B5-F  | AATGATACGGCGACCACCGAGATCTACACGACTGCGACTGGCGAACMGATTAGATACCKG                  | 62   |
| B5-1  | CAAGCAGAAGACGGCATAACGAGATTCCTTGTCTCCAGCCATTTAGTGTACGTCATCCCCACCTTC            | 69   |
| B5-2  | CAAGCAGAAGACGGCATAACGAGATACGAGACTGATTCAGCCATTTAGTGTACGTCATCCCCACCTTC          | 69   |
| B5-3  | CAAGCAGAAGACGGCATAACGAGATACCGGTATGTACCAGCCATTTAGTGTACGTCATCCCCACCTTC          | 69   |
| B5-4  | CAAGCAGAAGACGGCATAACGAGATTGCATACACTGGCAGCCATTTAGTGTACGTCATCCCCACCTTC          | 69   |
| B5-5  | CAAGCAGAAGACGGCATAACGAGATTGGTCAACGATACAGCCATTTAGTGTACGTCATCCCCACCTTC          | 69   |
| B5-6  | CAAGCAGAAGACGGCATAACGAGATATCGCACAGTAACAGCCATTTAGTGTACGTCATCCCCACCTTC          | 69   |
| B5-7  | CAAGCAGAAGACGGCATAACGAGATGTCGTGTAGCCTCAGCCATTTAGTGTACGTCATCCCCACCTTC          | 69   |
| B5-8  | CAAGCAGAAGACGGCATAACGAGATTACAGCGCATACCAGCCATTTAGTGTACGTCATCCCCACCTTC          | 69   |
| B5-9  | CAAGCAGAAGACGGCATAACGAGATATCCTTTGGTTCCAGCCATTTAGTGTACGTCATCCCCACCTTC          | 69   |
| B5-10 | CAAGCAGAAGACGGCATAACGAGATACGAGATAGTCTGAAACGAGCCAGCCATTTAGTGTACGTCATCCCCACCTTC | 69   |
| B5-11 | CAAGCAGAAGACGGCATAACGAGATACAGTACTCACAGCCATTTAGTGTACGTCATCCCCACCTTC            | 69   |
| B5-12 | CAAGCAGAAGACGGCATAACGAGATCCAATACGCTGCAGCCATTTAGTGTACGTCATCCCCACCTTC           | 69   |
| B5-13 | CAAGCAGAAGACGGCATAACGAGATGCAACACCATCCAGCCATTTAGTGTACGTCATCCCCACCTTC           | 69   |
| B5-14 | CAAGCAGAAGACGGCATAACGAGATAGTCGTGCACATCAGCCATTTAGTGTACGTCATCCCCACCTTC          | 69   |
| B5-15 | CAAGCAGAAGACGGCATAACGAGATAGTTACGAGATACAGCCATTTAGTGTACGTCATCCCCACCTTC          | 69   |
| B5-16 | CAAGCAGAAGACGGCATAACGAGATTTGCGTTAGCAGCAGCCATTTAGTGTACGTCATCCCCACCTTC          | 69   |
| B5-17 | CAAGCAGAAGACGGCATAACGAGATTACGAGCCCTAACAGCCATTTAGTGTACGTCATCCCCACCTTC          | 69   |
| B5-18 | CAAGCAGAAGACGGCATAACGAGATTGTCGCAATAGCAGCCATTTAGTGTACGTCATCCCCACCTTC           | 69   |
| B5-19 | CAAGCAGAAGACGGCATAACGAGATACAATAGCAACCCAGCCATTTAGTGTACGTCATCCCCACCTTC          | 69   |
| B5-20 | CAAGCAGAAGACGGCATAACGAGATTCTTACCCTCAGCCATTTAGTGTACGTCATCCCCACCTTC             | 69   |
| B5-21 | CAAGCAGAAGACGGCATAACGAGATCGATCGAACTCAGCCATTTAGTGTACGTCATCCCCACCTTC            | 69   |
| B5-22 | CAAGCAGAAGACGGCATAACGAGATATTGCAAGCAACCAGCCATTTAGTGTACGTCATCCCCACCTTC          | 69   |
| B5-23 | CAAGCAGAAGACGGCATAACGAGATAGCGCTCATCCAGCCATTTAGTGTACGTCATCCCCACCTTC            | 69   |
| B5-24 | CAAGCAGAAGACGGCATAACGAGATTCGACCAACACCCAGCCATTTAGTGTACGTCATCCCCACCTTC          | 69   |
| B5-25 | CAAGCAGAAGACGGCATAACGAGATTGTGTTACTCCTCAGCCATTTAGTGTACGTCATCCCCACCTTC          | 69   |
| B5-26 | CAAGCAGAAGACGGCATAACGAGATTGCACAGTCGCTCAGCCATTTAGTGTACGTCATCCCCACCTTC          | 69   |
| B5-27 | CAAGCAGAAGACGGCATAACGAGATTTCTAGAGTGCAGCCATTTAGTGTACGTCATCCCCACCTTC            | 69   |
| B5-28 | CAAGCAGAAGACGGCATAACGAGATACACCTGCGATCCAGCCATTTAGTGTACGTCATCCCCACCTTC          | 69   |
| B5-29 | CAAGCAGAAGACGGCATAACGAGATATCCTTCTCCACCAGCCATTTAGTGTACGTCATCCCCACCTTC          | 69   |
| B5-30 | CAAGCAGAAGACGGCATAACGAGATCATCGAGAGTTCAGCCATTTAGTGTACGTCATCCCCACCTTC           | 69   |
| B5-31 | CAAGCAGAAGACGGCATAACGAGATCACCACAGAAATCCAGCCATTTAGTGTACGTCATCCCCACCTTC         | 69   |
| B5-32 | CAAGCAGAAGACGGCATAACGAGATGGTCTTAGCACCCAGCCATTTAGTGTACGTCATCCCCACCTTC          | 69   |
| B5-33 | CAAGCAGAAGACGGCATAACGAGATTATCGCGGATACAGCCATTTAGTGTACGTCATCCCCACCTTC           | 69   |
| B5-34 | CAAGCAGAAGACGGCATAACGAGATCTCTACGAAACAGCAGCCATTTAGTGTACGTCATCCCCACCTTC         | 69   |
| B5-35 | CAAGCAGAAGACGGCATAACGAGATCTCCTCCCTTACCAGCCATTTAGTGTACGTCATCCCCACCTTC          | 69   |
| B5-36 | CAAGCAGAAGACGGCATAACGAGATCGTGTATGTGGCAGCCATTTAGTGTACGTCATCCCCACCTTC           | 69   |
| B5-37 | CAAGCAGAAGACGGCATAACGAGATATTAGACGCGTACAGCCATTTAGTGTACGTCATCCCCACCTTC          | 69   |
| B5-38 | CAAGCAGAAGACGGCATAACGAGATCAAGTTTCCGCGCAGCCATTTAGTGTACGTCATCCCCACCTTC          | 69   |
| B5-39 | CAAGCAGAAGACGGCATAACGAGATCCTTGTTCACCTCAGCCATTTAGTGTACGTCATCCCCACCTTC          | 69   |
| B5-40 | CAAGCAGAAGACGGCATAACGAGATAACAGCAGATTCAGCCATTTAGTGTACGTCATCCCCACCTTC           | 69   |
| B5-41 | CAAGCAGAAGACGGCATAACGAGATCTAGAGTCCCACAGCCATTTAGTGTACGTCATCCCCACCTTC           | 69   |
| B5-42 | CAAGCAGAAGACGGCATAACGAGATCAGCAGTCTACCAGCCATTTAGTGTACGTCATCCCCACCTTC           | 69   |
| B5-43 | CAAGCAGAAGACGGCATAACGAGATACAAACATGGTCCAGCCATTTAGTGTACGTCATCCCCACCTTC          | 69   |
| B5-44 | CAAGCAGAAGACGGCATAACGAGATTCGAAACATGCACAGCCATTTAGTGTACGTCATCCCCACCTTC          | 69   |
| B5-45 | CAAGCAGAAGACGGCATAACGAGATTTCCACCCATTCAGCCATTTAGTGTACGTCATCCCCACCTTC           | 69   |
| B5-46 | CAAGCAGAAGACGGCATAACGAGATAGCAGAACATCTCAGCCATTTAGTGTACGTCATCCCCACCTTC          | 69   |
| B5-47 | CAAGCAGAAGACGGCATAACGAGATGAAACATCCACCCAGCCATTTAGTGTACGTCATCCCCACCTTC          | 69   |
| B5-48 | CAAGCAGAAGACGGCATAACGAGATCTGTCACTGACCCAGCCATTTAGTGTACGTCATCCCCACCTTC          | 69   |
| B5-49 | CAAGCAGAAGACGGCATAACGAGATCGGATCTAGTGTACGCCATTTAGTGTACGTCATCCCCACCTTC          | 69   |
| B5-50 | CAAGCAGAAGACGGCATAACGAGATTTCTCCATCACACAGCCATTTAGTGTACGTCATCCCCACCTTC          | 69   |
| B5-51 | CAAGCAGAAGACGGCATAACGAGATATTTAGGACGACCCAGCCATTTAGTGTACGTCATCCCCACCTTC         | 69   |
| B5-52 | CAAGCAGAAGACGGCATAACGAGATGGTCTTAAACAGCCAGCCATTTAGTGTACGTCATCCCCACCTTC         | 69   |
| B5-53 | CAAGCAGAAGACGGCATAACGAGATAGACAGTAGGAGCAGCCATTTAGTGTACGTCATCCCCACCTTC          | 69   |
| B5-54 | CAAGCAGAAGACGGCATAACGAGATGCAGATTTCCAGCAGCCATTTAGTGTACGTCATCCCCACCTTC          | 69   |
| B5-55 | CAAGCAGAAGACGGCATAACGAGATAGATGATCAGTCCAGCCATTTAGTGTACGTCATCCCCACCTTC          | 69   |
| B5-56 | CAAGCAGAAGACGGCATAACGAGATTATCACGGCACCAGCCATTTAGTGTACGTCATCCCCACCTTC           | 69   |
| B5-57 | CAAGCAGAAGACGGCATAACGAGATCCAGATACAGCAGCCATTTAGTGTACGTCATCCCCACCTTC            | 69   |
| B5-58 | CAAGCAGAAGACGGCATAACGAGATGGTCTCCTACAGCAGCCATTTAGTGTACGTCATCCCCACCTTC          | 69   |
| B5-59 | CAAGCAGAAGACGGCATAACGAGATACAGCTCAAACAGCCATTTAGTGTACGTCATCCCCACCTTC            | 69   |
| B5-60 | CAAGCAGAAGACGGCATAACGAGATATAGCGAACTCACAGCCATTTAGTGTACGTCATCCCCACCTTC          | 69   |
| B5-61 | CAAGCAGAAGACGGCATAACGAGATAACCGCATAAAGTCAGCCATTTAGTGTACGTCATCCCCACCTTC         | 69   |
| B5-62 | CAAGCAGAAGACGGCATAACGAGATCTTGGAAATCGCAGCCATTTAGTGTACGTCATCCCCACCTTC           | 69   |
| B5-63 | CAAGCAGAAGACGGCATAACGAGATCAGTCGTTAAGACAGCCATTTAGTGTACGTCATCCCCACCTTC          | 69   |
| B5-64 | CAAGCAGAAGACGGCATAACGAGATCTTCCAATCATCAGCCATTTAGTGTACGTCATCCCCACCTTC           | 69   |

|                 |                                                                         |           |
|-----------------|-------------------------------------------------------------------------|-----------|
| B5-65           | CAAGCAGAAGACGGCATAACGAGATAATAGCATGTCGCAGCCATTTAGTGTACAGTCATCCCCACCTTCC  | 69        |
| B5-66           | CAAGCAGAAGACGGCATAACGAGATAAGTACACACACAGCCATTTAGTGTACAGTCATCCCCACCTTCC   | 69        |
| B5-67           | CAAGCAGAAGACGGCATAACGAGATCACACAAAGTCACAGCCATTTAGTGTACAGTCATCCCCACCTTCC  | 69        |
| B5-68           | CAAGCAGAAGACGGCATAACGAGATGTTCCCTCCATTACAGCCATTTAGTGTACAGTCATCCCCACCTTCC | 69        |
| B5-69           | CAAGCAGAAGACGGCATAACGAGATCATCAAGCATAGCAGCCATTTAGTGTACAGTCATCCCCACCTTCC  | 69        |
| B5-70           | CAAGCAGAAGACGGCATAACGAGATCAAGCCCTAGTACAGCCATTTAGTGTACAGTCATCCCCACCTTCC  | 69        |
| B5-71           | CAAGCAGAAGACGGCATAACGAGATCCTCTGAGAGCTCAGCCATTTAGTGTACAGTCATCCCCACCTTCC  | 69        |
| B5-72           | CAAGCAGAAGACGGCATAACGAGATAACAAGAACCTTGCAGCCATTTAGTGTACAGTCATCCCCACCTTCC | 69        |
| B5-73           | CAAGCAGAAGACGGCATAACGAGATTCATTCCACTCACAGCCATTTAGTGTACAGTCATCCCCACCTTCC  | 69        |
| B5-74           | CAAGCAGAAGACGGCATAACGAGATACCATCCAACGACAGCCATTTAGTGTACAGTCATCCCCACCTTCC  | 69        |
| B5-75           | CAAGCAGAAGACGGCATAACGAGATATGCCGGTAATACAGCCATTTAGTGTACAGTCATCCCCACCTTCC  | 69        |
| B5-76           | CAAGCAGAAGACGGCATAACGAGATTCACCCGTGAACAGCCATTTAGTGTACAGTCATCCCCACCTTCC   | 69        |
| B5-77           | CAAGCAGAAGACGGCATAACGAGATTCCTGTAGAGCCACAGCCATTTAGTGTACAGTCATCCCCACCTTCC | 69        |
| B5-78           | CAAGCAGAAGACGGCATAACGAGATTCGGATCTGTGACAGCCATTTAGTGTACAGTCATCCCCACCTTCC  | 69        |
| B5-79           | CAAGCAGAAGACGGCATAACGAGATACTACCTCTTACAGCCATTTAGTGTACAGTCATCCCCACCTTCC   | 69        |
| B5-80           | CAAGCAGAAGACGGCATAACGAGATCTATCCAAGTGGCAGCCATTTAGTGTACAGTCATCCCCACCTTCC  | 69        |
| B5-81           | CAAGCAGAAGACGGCATAACGAGATAGCCAGTCATACCAGCCATTTAGTGTACAGTCATCCCCACCTTCC  | 69        |
| B5-82           | CAAGCAGAAGACGGCATAACGAGATGAGTTAGCATCACAGCCATTTAGTGTACAGTCATCCCCACCTTCC  | 69        |
| B5-83           | CAAGCAGAAGACGGCATAACGAGATTAAGACTACTGGCAGCCATTTAGTGTACAGTCATCCCCACCTTCC  | 69        |
| B5-84           | CAAGCAGAAGACGGCATAACGAGATGTCTCTCCCTTCAGCCATTTAGTGTACAGTCATCCCCACCTTCC   | 69        |
| B5-85           | CAAGCAGAAGACGGCATAACGAGATCTTAGCTACTCTCAGCCATTTAGTGTACAGTCATCCCCACCTTCC  | 69        |
| B5-86           | CAAGCAGAAGACGGCATAACGAGATATCGAATCGAGTCAGCCATTTAGTGTACAGTCATCCCCACCTTCC  | 69        |
| B5-87           | CAAGCAGAAGACGGCATAACGAGATCGCGTCAAACACAGCCATTTAGTGTACAGTCATCCCCACCTTCC   | 69        |
| B5-88           | CAAGCAGAAGACGGCATAACGAGATGATCAACCCACACAGCCATTTAGTGTACAGTCATCCCCACCTTCC  | 69        |
| B5-89           | CAAGCAGAAGACGGCATAACGAGATAGTGTGATTTCGAGCCATTTAGTGTACAGTCATCCCCACCTTCC   | 69        |
| B5-90           | CAAGCAGAAGACGGCATAACGAGATTCGGAGTCAACCACAGCCATTTAGTGTACAGTCATCCCCACCTTCC | 69        |
| B5-91           | CAAGCAGAAGACGGCATAACGAGATAGTCTGTCTGCGCAGCCATTTAGTGTACAGTCATCCCCACCTTCC  | 69        |
| B5-92           | CAAGCAGAAGACGGCATAACGAGATAGACAAGCTTCCCAGCCATTTAGTGTACAGTCATCCCCACCTTCC  | 69        |
| B5-93           | CAAGCAGAAGACGGCATAACGAGATGATCTAATCGAGCAGCCATTTAGTGTACAGTCATCCCCACCTTCC  | 69        |
| B5-94           | CAAGCAGAAGACGGCATAACGAGATTAACCGCAGCTCCAGCCATTTAGTGTACAGTCATCCCCACCTTCC  | 69        |
| B5-95           | CAAGCAGAAGACGGCATAACGAGATTCACGAGTCAACACAGCCATTTAGTGTACAGTCATCCCCACCTTCC | 69        |
| B5-96           | CAAGCAGAAGACGGCATAACGAGATTTGAACAAGCCACAGCCATTTAGTGTACAGTCATCCCCACCTTCC  | 69        |
| <b>B5-R1</b>    | <b>ACGACTGCGACTGGCGAACMGGATTAGATACCC</b>                                | <b>33</b> |
| <b>B5-R2</b>    | <b>CAGCCATTTAGTGTACAGTCATCCCCACCTTCC</b>                                | <b>33</b> |
| <b>B5-Index</b> | <b>GGAAGGTGGGGATGACGTGACACTAAATGGCTG</b>                                | <b>33</b> |

**Table S1, related to Figures 1 and 2: Primers.**

Primer names and sequences used for amplification of V5-V7 region of the 16S rRNA gene and addition of sample barcodes and Illumina adaptors for root microbiota profiling.

# Table S2

| Strain     | Phylum         | Class               | Order                 | Family             | Genus                                                          | SynCom_Member |
|------------|----------------|---------------------|-----------------------|--------------------|----------------------------------------------------------------|---------------|
| Root100    | Proteobacteria | Alphaproteobacteria | Rhizobiales           | Rhizobiaceae       | Aminobacter                                                    | Yes           |
| Root112D2  | Actinobacteria | Actinobacteria      | Micrococcales         | Microbacteriaceae  |                                                                | Yes           |
| Root1203   | Proteobacteria | Alphaproteobacteria | Rhizobiales           | Rhizobiaceae       | Allorhizobium-<br>Neorhizobium-<br>Pararhizobium-<br>Rhizobium | Yes           |
| Root1212   | Proteobacteria | Alphaproteobacteria | Rhizobiales           | Rhizobiaceae       | Allorhizobium-<br>Neorhizobium-<br>Pararhizobium-<br>Rhizobium | Yes           |
| Root122    | Actinobacteria | Actinobacteria      | Propionibacteriales   | Nocardioideae      | Nocardioides                                                   | Yes           |
| Root123D2  | Proteobacteria | Alphaproteobacteria | Rhizobiales           | Xanthobacteraceae  |                                                                | Yes           |
| Root1240   | Proteobacteria | Alphaproteobacteria | Rhizobiales           | Rhizobiaceae       | Allorhizobium-<br>Neorhizobium-<br>Pararhizobium-<br>Rhizobium | Yes           |
| Root1257   | Actinobacteria | Actinobacteria      | Propionibacteriales   | Nocardioideae      | Nocardioides                                                   | Yes           |
| Root1272   | Proteobacteria | Gammaproteobacteria | Betaproteobacteriales | Burkholderiaceae   |                                                                | Yes           |
| Root1279   | Proteobacteria | Alphaproteobacteria | Caulobacterales       | Caulobacteraceae   | Brevundimonas                                                  | Yes           |
| Root1280   | Proteobacteria | Gammaproteobacteria | Pseudomonadales       | Moraxellaceae      | Acinetobacter                                                  | Yes           |
| Root1290   | Proteobacteria | Alphaproteobacteria | Caulobacterales       | Caulobacteraceae   | Phenylobacterium                                               | Yes           |
| Root1293   | Actinobacteria | Actinobacteria      | Micrococcales         | Microbacteriaceae  | Leifsonia                                                      | Yes           |
| Root1294   | Proteobacteria | Alphaproteobacteria | Sphingomonadales      | Sphingomonadaceae  | Sphingomonas                                                   | Yes           |
| Root1295   | Actinobacteria | Actinobacteria      | Streptomycetales      | Streptomycetaceae  | Streptomyces                                                   | Yes           |
| Root1304   | Actinobacteria | Actinobacteria      | Streptomycetales      | Streptomycetaceae  | Streptomyces                                                   | Yes           |
| Root131    | Firmicutes     | Bacilli             | Bacillales            | Bacillaceae        | Bacillus                                                       | Yes           |
| Root1312   | Proteobacteria | Alphaproteobacteria | Rhizobiales           | Rhizobiaceae       | Ensifer                                                        | Yes           |
| Root135    | Actinobacteria | Actinobacteria      | Corynebacteriales     | Mycobacteriaceae   | Mycobacterium                                                  | Yes           |
| Root136    | Actinobacteria | Actinobacteria      | Corynebacteriales     | Nocardiaceae       | Nocardia                                                       | Yes           |
| Root1444   | Proteobacteria | Gammaproteobacteria | Betaproteobacteriales | Burkholderiaceae   | Pelomonas                                                      | Yes           |
| Root1464   | Actinobacteria | Actinobacteria      | Micrococcales         | Microbacteriaceae  | Agromyces                                                      | Yes           |
| Root147    | Firmicutes     | Bacilli             | Bacillales            | Bacillaceae        | Bacillus                                                       | Yes           |
| Root1471   | Proteobacteria | Alphaproteobacteria | Rhizobiales           | Rhizobiaceae       | Mesorhizobium                                                  | Yes           |
| Root1480D1 | Proteobacteria | Gammaproteobacteria | Betaproteobacteriales | Burkholderiaceae   | Pseudoduganella                                                | Yes           |
| Root149    | Proteobacteria | Alphaproteobacteria | Rhizobiales           | Rhizobiaceae       | Allorhizobium-<br>Neorhizobium-<br>Pararhizobium-<br>Rhizobium | Yes           |
| Root151    | Actinobacteria | Actinobacteria      | Propionibacteriales   | Nocardioideae      | Nocardioides                                                   | Yes           |
| Root154    | Proteobacteria | Alphaproteobacteria | Sphingomonadales      | Sphingomonadaceae  | Sphingopyxis                                                   | Yes           |
| Root157    | Proteobacteria | Alphaproteobacteria | Rhizobiales           | Rhizobiaceae       | Phyllobacterium                                                | Yes           |
| Root166    | Actinobacteria | Actinobacteria      | Micrococcales         | Microbacteriaceae  | Microbacterium                                                 | Yes           |
| Root16D2   | Proteobacteria | Gammaproteobacteria | Betaproteobacteriales | Burkholderiaceae   | Rhizobacter                                                    | Yes           |
| Root170    | Proteobacteria | Gammaproteobacteria | Betaproteobacteriales | Burkholderiaceae   | Achromobacter                                                  | Yes           |
| Root172    | Proteobacteria | Alphaproteobacteria | Rhizobiales           | Rhizobiaceae       | Mesorhizobium                                                  | Yes           |
| Root179    | Proteobacteria | Gammaproteobacteria | Xanthomonadales       | Rhodanobacteraceae | Rhodanobacter                                                  | Yes           |
| Root181    | Actinobacteria | Actinobacteria      | Micrococcales         | Intrasporangiaceae | Terrabacter                                                    | Yes           |
| Root189    | Proteobacteria | Gammaproteobacteria | Betaproteobacteriales | Burkholderiaceae   | Noviherbaspirillum                                             | Yes           |
| Root190    | Actinobacteria | Actinobacteria      | Propionibacteriales   | Nocardioideae      | Nocardioides                                                   | Yes           |
| Root209    | Proteobacteria | Gammaproteobacteria | Betaproteobacteriales | Burkholderiaceae   | Hydrogenophaga                                                 | Yes           |
| Root22     | Actinobacteria | Actinobacteria      | Micrococcales         | Cellulomonadaceae  | Oerskovia                                                      | Yes           |
| Root227    | Actinobacteria | Actinobacteria      | Micrococcales         | Microbacteriaceae  | Leifsonia                                                      | Yes           |
| Root231    | Proteobacteria | Alphaproteobacteria | Rhizobiales           | Rhizobiaceae       | Allorhizobium-<br>Neorhizobium-<br>Pararhizobium-<br>Rhizobium | Yes           |
| Root236    | Actinobacteria | Actinobacteria      | Propionibacteriales   | Nocardioideae      | Aeromicrobium                                                  | Yes           |
| Root275    | Proteobacteria | Gammaproteobacteria | Betaproteobacteriales | Burkholderiaceae   | Acidovorax                                                     | Yes           |
| Root318D1  | Proteobacteria | Gammaproteobacteria | Betaproteobacteriales | Burkholderiaceae   | Variovorax                                                     | Yes           |
| Root322    | Actinobacteria | Actinobacteria      | Micrococcales         | Microbacteriaceae  | Microbacterium                                                 | Yes           |
| Root329    | Proteobacteria | Gammaproteobacteria | Pseudomonadales       | Pseudomonadaceae   | Pseudomonas                                                    | Yes           |
| Root381    | Proteobacteria | Alphaproteobacteria | Rhizobiales           | Beijerinckiaceae   | Bosea                                                          | Yes           |
| Root4      | Actinobacteria | Actinobacteria      | Micrococcales         | Microbacteriaceae  | Leifsonia                                                      | Yes           |
| Root402    | Proteobacteria | Gammaproteobacteria | Betaproteobacteriales | Burkholderiaceae   | Acidovorax                                                     | Yes           |
| Root404    | Proteobacteria | Gammaproteobacteria | Betaproteobacteriales | Burkholderiaceae   | Rhizobacter                                                    | Yes           |
| Root405    | Proteobacteria | Gammaproteobacteria | Betaproteobacteriales | Burkholderiaceae   | Pelomonas                                                      | Yes           |
| Root456    | Actinobacteria | Actinobacteria      | Kineosporiales        | Kineosporiaceae    | Angustibacter                                                  | Yes           |
| Root472D3  | Actinobacteria | Actinobacteria      | Propionibacteriales   | Nocardioideae      | Aeromicrobium                                                  | Yes           |

|           |                |                     |                       |                    |                                                                |     |
|-----------|----------------|---------------------|-----------------------|--------------------|----------------------------------------------------------------|-----|
| Root473   | Proteobacteria | Gammaproteobacteria | Betaproteobacteriales | Burkholderiaceae   | Variovorax                                                     | Yes |
| Root480   | Proteobacteria | Gammaproteobacteria | Xanthomonadales       | Rhodanobacteraceae | Rhodanobacter                                                  | Yes |
| Root482   | Proteobacteria | Alphaproteobacteria | Rhizobiales           | Rhizobiaceae       | Allorhizobium-<br>Neorhizobium-<br>Pararhizobium-<br>Rhizobium | Yes |
| Root483D2 | Proteobacteria | Alphaproteobacteria | Rhizobiales           | Rhizobiaceae       | Allorhizobium-<br>Neorhizobium-<br>Pararhizobium-<br>Rhizobium | Yes |
| Root491   | Proteobacteria | Alphaproteobacteria | Rhizobiales           | Rhizobiaceae       | Allorhizobium-<br>Neorhizobium-<br>Pararhizobium-<br>Rhizobium | Yes |
| Root495   | Actinobacteria | Actinobacteria      | Propionibacteriales   | Nocardiodaceae     | Aeromicrobium                                                  | Yes |
| Root53    | Actinobacteria | Actinobacteria      | Micrococcales         | Microbacteriaceae  | Microbacterium                                                 | Yes |
| Root552   | Proteobacteria | Alphaproteobacteria | Rhizobiales           | Rhizobiaceae       | Aminobacter                                                    | Yes |
| Root562   | Proteobacteria | Gammaproteobacteria | Pseudomonadales       | Pseudomonadaceae   | Pseudomonas                                                    | Yes |
| Root563   | Actinobacteria | Actinobacteria      | Micrococcales         | Intrasporangiaceae | Phycococcus                                                    | Yes |
| Root564   | Proteobacteria | Alphaproteobacteria | Rhizobiales           | Rhizobiaceae       | Allorhizobium-<br>Neorhizobium-<br>Pararhizobium-<br>Rhizobium | Yes |
| Root565   | Proteobacteria | Gammaproteobacteria | Betaproteobacteriales | Burkholderiaceae   | Achromobacter                                                  | Yes |
| Root569   | Proteobacteria | Gammaproteobacteria | Pseudomonadales       | Pseudomonadaceae   | Pseudomonas                                                    | Yes |
| Root604   | Proteobacteria | Gammaproteobacteria | Xanthomonadales       | Xanthomonadaceae   | Lysobacter                                                     | Yes |
| Root61    | Actinobacteria | Actinobacteria      | Micrococcales         | Microbacteriaceae  | Microbacterium                                                 | Yes |
| Root65    | Proteobacteria | Gammaproteobacteria | Xanthomonadales       | Xanthomonadaceae   | Xanthomonas                                                    | Yes |
| Root670   | Proteobacteria | Alphaproteobacteria | Rhizobiales           | Beijerinckiaceae   | Bosea                                                          | Yes |
| Root68    | Proteobacteria | Gammaproteobacteria | Pseudomonadales       | Pseudomonadaceae   | Pseudomonas                                                    | Yes |
| Root682   | Actinobacteria | Actinobacteria      | Propionibacteriales   | Nocardiodaceae     | Nocardioides                                                   | Yes |
| Root690   | Proteobacteria | Gammaproteobacteria | Xanthomonadales       | Xanthomonadaceae   | Lysobacter                                                     | Yes |
| Root695   | Proteobacteria | Alphaproteobacteria | Rhizobiales           | Rhizobiaceae       | Mesorhizobium                                                  | Yes |
| Root70    | Proteobacteria | Gammaproteobacteria | Betaproteobacteriales | Burkholderiaceae   | Acidovorax                                                     | Yes |
| Root708   | Proteobacteria | Alphaproteobacteria | Rhizobiales           | Rhizobiaceae       | Allorhizobium-<br>Neorhizobium-<br>Pararhizobium-<br>Rhizobium | Yes |
| Root79    | Actinobacteria | Actinobacteria      | Propionibacteriales   | Nocardiodaceae     | Nocardioides                                                   | Yes |
| Root81    | Actinobacteria | Actinobacteria      | Micrococcales         | Microbacteriaceae  | Agromyces                                                      | Yes |
| Root83    | Proteobacteria | Gammaproteobacteria | Betaproteobacteriales | Burkholderiaceae   | Achromobacter                                                  | Yes |
| Root9     | Proteobacteria | Gammaproteobacteria | Pseudomonadales       | Pseudomonadaceae   | Pseudomonas                                                    | Yes |
| Root918   | Actinobacteria | Actinobacteria      | Micrococcales         | Cellulomonadaceae  | Oerskovia                                                      | Yes |
| Root920   | Firmicutes     | Bacilli             | Bacillales            | Bacillaceae        | Bacillus                                                       | Yes |
| Root930   | Actinobacteria | Actinobacteria      | Micrococcales         | Cellulomonadaceae  | Cellulomonas                                                   | Yes |
| Root935   | Bacteroidetes  | Bacteroidia         | Flavobacteriales      | Flavobacteriaceae  | Flavobacterium                                                 | Yes |
| Root96    | Proteobacteria | Gammaproteobacteria | Xanthomonadales       | Xanthomonadaceae   | Lysobacter                                                     | Yes |
| Soil522   | Firmicutes     | Bacilli             | Bacillales            | Paenibacillaceae   | Paenibacillus                                                  | Yes |
| Soil531   | Firmicutes     | Bacilli             | Bacillales            | Bacillaceae        | Bacillus                                                       | Yes |
| Soil535   | Actinobacteria | Actinobacteria      | Micrococcales         | Microbacteriaceae  | Agromyces                                                      | Yes |
| Soil538   | Actinobacteria | Actinobacteria      | Corynebacteriales     | Mycobacteriaceae   | Mycobacterium                                                  | Yes |
| Soil724D2 | Firmicutes     | Bacilli             | Bacillales            | Paenibacillaceae   | Paenibacillus                                                  | Yes |
| Soil728   | Actinobacteria | Actinobacteria      | Micrococcales         | Intrasporangiaceae | Janibacter                                                     | Yes |
| Soil729   | Actinobacteria | Actinobacteria      | Micrococcales         | Intrasporangiaceae | Knoellia                                                       | Yes |
| Soil736   | Actinobacteria | Actinobacteria      | Micrococcales         | Micrococcaceae     | Arthrobacter                                                   | Yes |
| Soil745   | Firmicutes     | Bacilli             | Bacillales            | Bacillaceae        | Bacillus                                                       | Yes |
| Soil748   | Actinobacteria | Actinobacteria      | Micrococcales         | Intrasporangiaceae | Phycococcus                                                    | Yes |
| Soil750   | Firmicutes     | Bacilli             | Bacillales            | Paenibacillaceae   | Paenibacillus                                                  | Yes |
| Soil756   | Actinobacteria | Actinobacteria      | Micrococcales         | Intrasporangiaceae | Tetrasphaera                                                   | Yes |
| Soil761   | Actinobacteria | Actinobacteria      | Micrococcales         | Micrococcaceae     | Pseudarthrobacter                                              | Yes |
| Soil762   | Actinobacteria | Actinobacteria      | Micrococcales         | Micrococcaceae     | Pseudarthrobacter                                              | Yes |
| Soil763   | Actinobacteria | Actinobacteria      | Micrococcales         | Micrococcaceae     | Pseudarthrobacter                                              | Yes |
| Soil764   | Actinobacteria | Actinobacteria      | Micrococcales         | Micrococcaceae     | Pseudarthrobacter                                              | Yes |
| Soil766   | Firmicutes     | Bacilli             | Bacillales            | Paenibacillaceae   | Paenibacillus                                                  | Yes |
| Soil768D1 | Firmicutes     | Bacilli             | Bacillales            | Bacillaceae        | Bacillus                                                       | Yes |
| Soil772   | Proteobacteria | Gammaproteobacteria | Xanthomonadales       | Rhodanobacteraceae |                                                                | Yes |
| Soil773   | Proteobacteria | Gammaproteobacteria | Xanthomonadales       | Rhodanobacteraceae | Rhodanobacter                                                  | Yes |
| Soil774   | Actinobacteria | Actinobacteria      | Propionibacteriales   | Nocardiodaceae     | Nocardioides                                                   | Yes |
| Soil777   | Actinobacteria | Actinobacteria      | Propionibacteriales   | Nocardiodaceae     | Nocardioides                                                   | Yes |

|          |                |                     |                       |                    |                                                                |     |
|----------|----------------|---------------------|-----------------------|--------------------|----------------------------------------------------------------|-----|
| Soil782  | Actinobacteria | Actinobacteria      | Micrococcales         | Micrococcaceae     | Arthrobacter                                                   | Yes |
| Soil796  | Actinobacteria | Actinobacteria      | Propionibacteriales   | Nocardiodaceae     | Nocardioides                                                   | Yes |
| Soil797  | Actinobacteria | Actinobacteria      | Propionibacteriales   | Nocardiodaceae     | Nocardioides                                                   | Yes |
| Soil802  | Actinobacteria | Actinobacteria      | Micrococcales         | Intrasporangiaceae | Phycococcus                                                    | Yes |
| Soil803  | Actinobacteria | Actinobacteria      | Micrococcales         | Intrasporangiaceae | Phycococcus                                                    | Yes |
| Soil805  | Actinobacteria | Actinobacteria      | Propionibacteriales   | Nocardiodaceae     | Nocardioides                                                   | Yes |
| Soil810  | Actinobacteria | Actinobacteria      | Micrococcales         | Intrasporangiaceae | Terrabacter                                                    | Yes |
| Soil811  | Actinobacteria | Actinobacteria      | Micrococcales         | Intrasporangiaceae | Terrabacter                                                    | Yes |
| Root1221 | Proteobacteria | Gammaproteobacteria | Betaproteobacteriales | Burkholderiaceae   | Rhizobacter                                                    | No  |
| Root267  | Proteobacteria | Gammaproteobacteria | Betaproteobacteriales | Burkholderiaceae   | Acidovorax                                                     | No  |
| Root217  | Proteobacteria | Gammaproteobacteria | Betaproteobacteriales | Burkholderiaceae   | Acidovorax                                                     | No  |
| Root335  | Proteobacteria | Gammaproteobacteria | Betaproteobacteriales | Burkholderiaceae   | Massilia                                                       | No  |
| Root434  | Proteobacteria | Gammaproteobacteria | Betaproteobacteriales | Burkholderiaceae   | Variovorax                                                     | No  |
| Root568  | Proteobacteria | Gammaproteobacteria | Betaproteobacteriales | Burkholderiaceae   | Acidovorax                                                     | No  |
| Root268  | Proteobacteria | Alphaproteobacteria | Rhizobiales           | Rhizobiaceae       | Allorhizobium-<br>Neorhizobium-<br>Pararhizobium-<br>Rhizobium | No  |
| Root71   | Proteobacteria | Gammaproteobacteria | Pseudomonadales       | Pseudomonadaceae   | Pseudomonas                                                    | No  |

**Table S2, related to Figure 3: Bacterial strains.**

Name and taxonomy of bacterial strains used in this study. All strains are derived from the At-RSPHERE culture collection (Bai et al., 2015) and were isolated from *A. thaliana* roots growing in CAS. Strains included in the 115-member SynCom used for root microbiota reconstitution are indicated.
